# Supplementary material
Source: MDPI journal article supplement (https://www.mdpi.com/2073-4344/13/6/1027)
Supplement: s1 [file s1]

# Supporting Information

## Long-term Hydrogen Production from a Methanol–Water Solution Catalyzed by an Iridium Complex

Shohichi Furukawa, Kaito Kubota, Han Wang, Haotong Gong, Shumpei Kajita, and Ken-ichi Fujita\*

*Graduate School of Human and Environmental Studies, Kyoto University, Kyoto 606-8501, Japan*

*Correspondence: fujita.kenichi.6a@kyoto-u.ac.jp; Tel.: +81-75-753-6827*

### Contents

|                                                                                                                 |    |
|-----------------------------------------------------------------------------------------------------------------|----|
| <b>Figure S1.</b> The reaction setup for the experiments performed in Table 1                                   | S2 |
| <b>Figure S2.</b> The reaction setup for the experiments performed in Table 2 and Figure 4                      | S2 |
| <b>Figure S3.</b> GC analysis of the evolved gas by the reaction of methanol and water under optimal conditions | S3 |
| <b>Figure S4.</b> Results of the catalyst stability test at high temperature for a long period of time          | S4 |
| <b>Scheme S1.</b> Possible mechanism for the hydrogen production from a methanol-water solution                 | S5 |

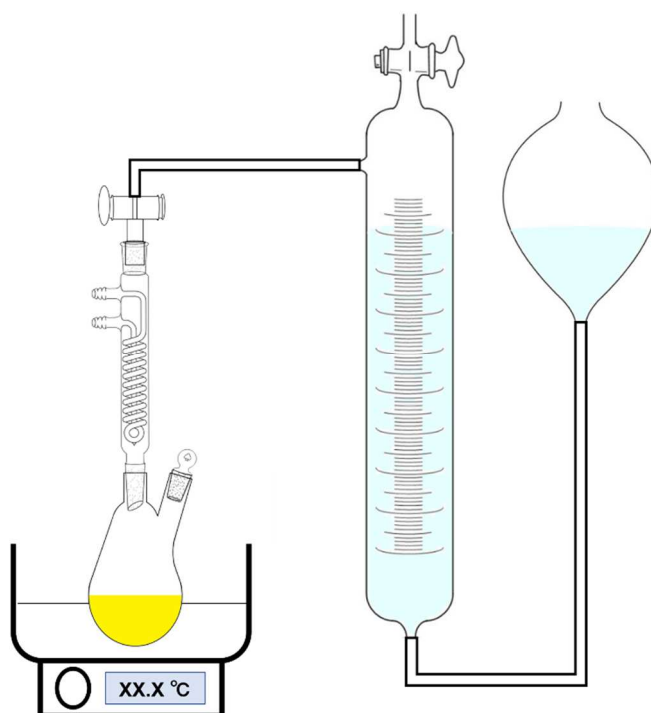

**Figure S1.** The reaction setup for the experiments performed in Table 1.

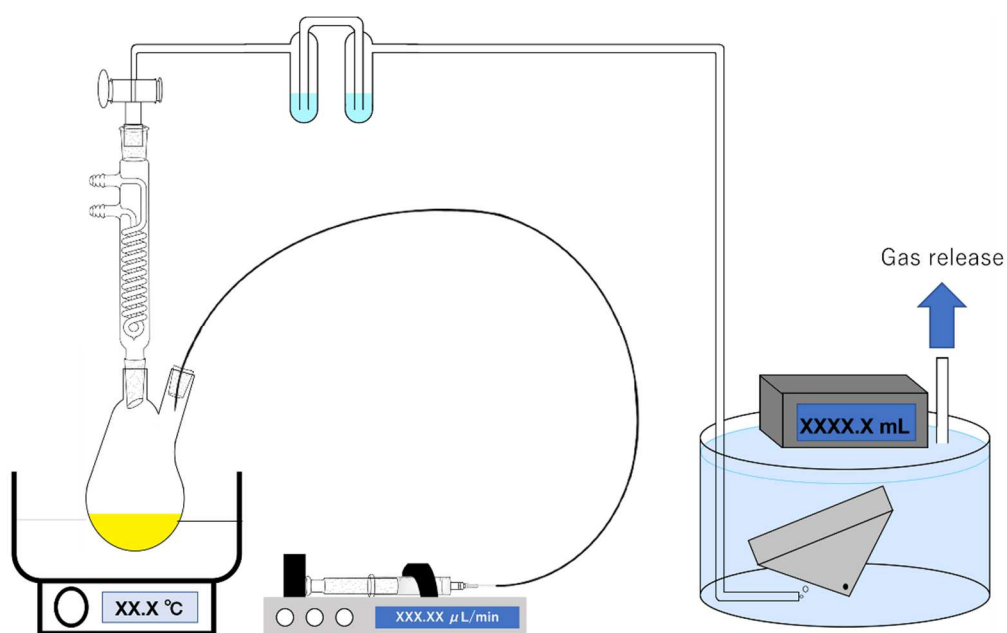

**Figure S2.** The reaction setup for the experiments performed in Table 2 and Figure 4

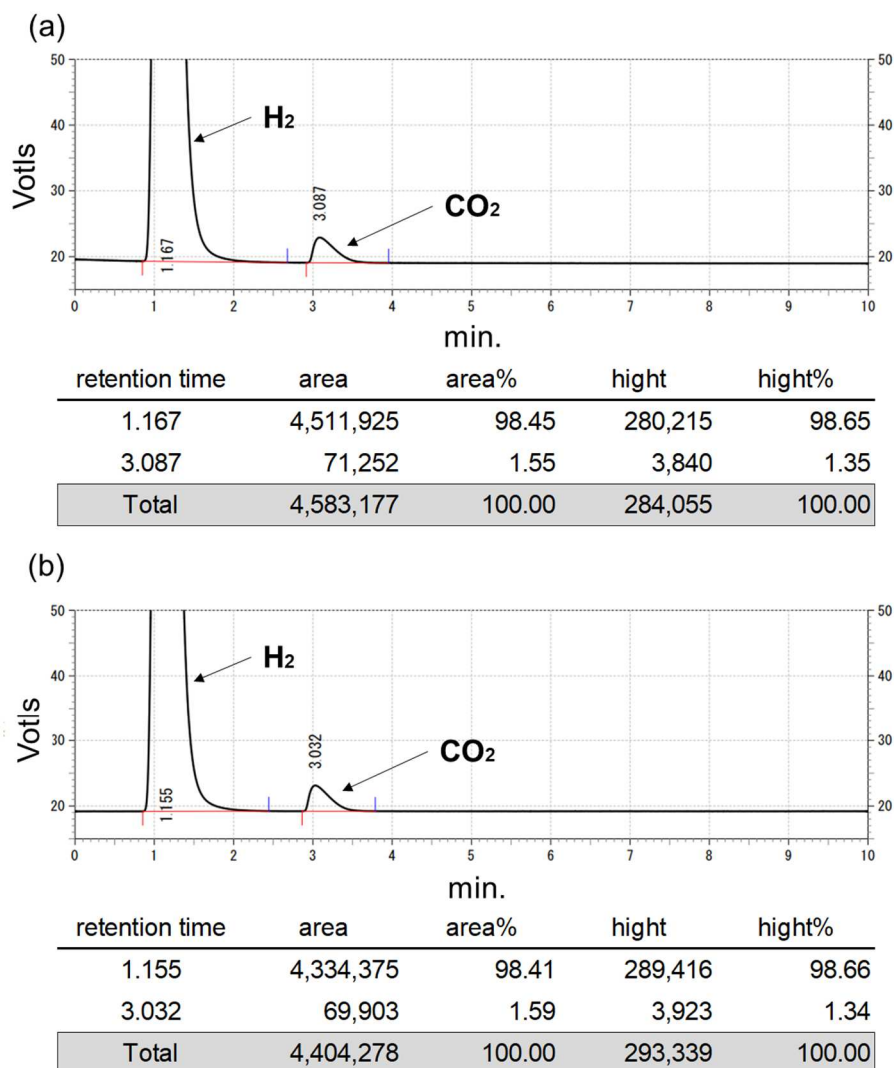

**Figure S3.** GC analysis of the evolved gas by the reaction of methanol and water under optimal conditions (a) The chromatogram of the evolved gas by the reaction catalyzed by the catalyst **2**. (b) The chromatogram of the standard hydrogen and carbon dioxide mixed gas ( $H_2:CO_2 = 3:1$ ).

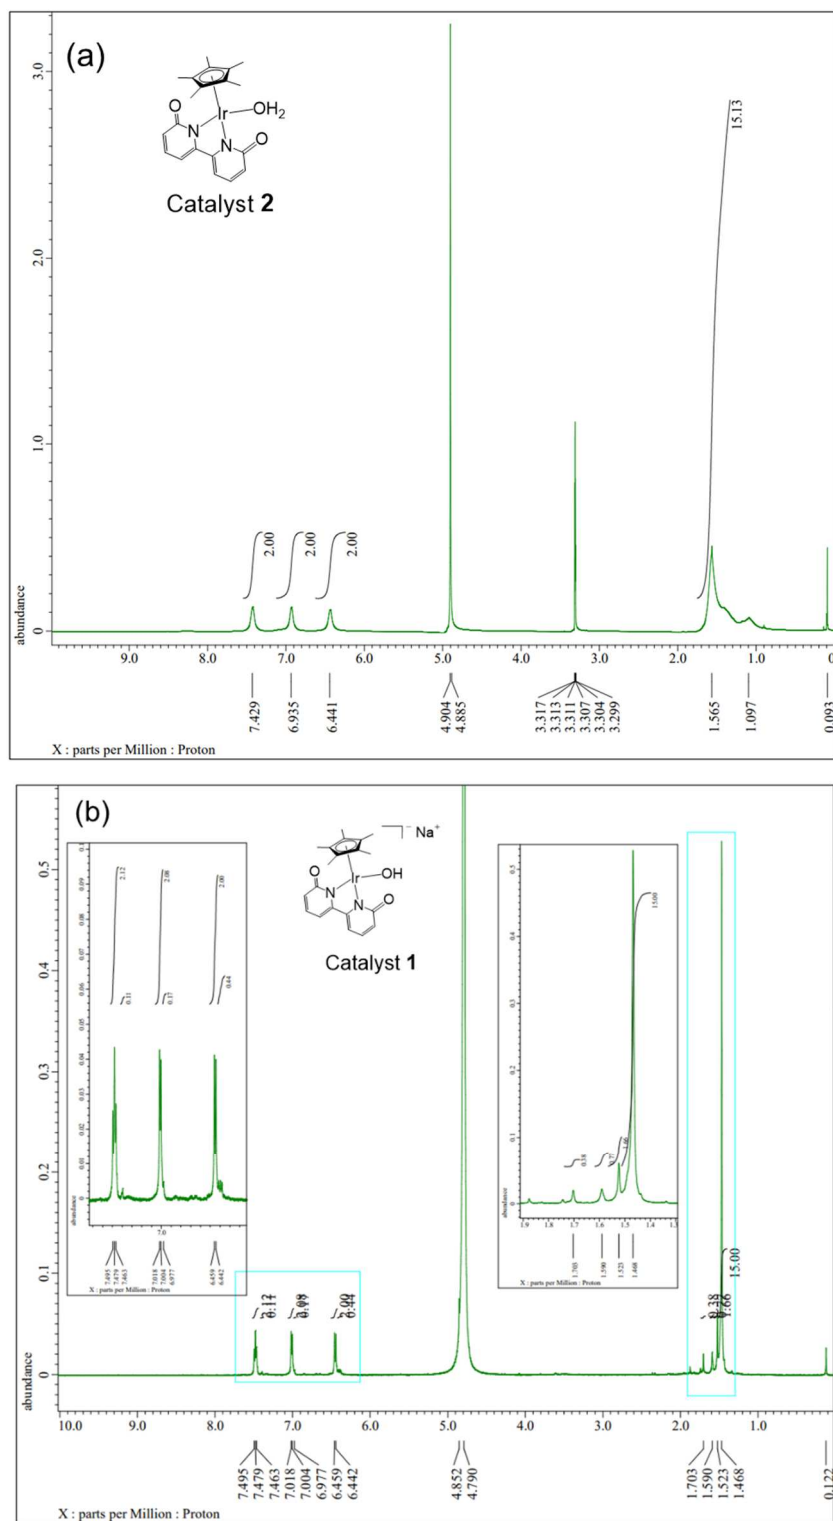

**Figure S4.** Results of the catalyst stability test at high temperature for a long period of time (a)  $^1\text{H}$  NMR spectrum of catalyst **2** (measured in  $\text{CD}_3\text{OD}$ ) after refluxing for 400 hours at  $150^\circ\text{C}$  in a water solvent [1]. (b)  $^1\text{H}$  NMR spectrum of catalyst **1** (measured in  $\text{D}_2\text{O}$ ) after refluxing for 400 hours at  $150^\circ\text{C}$  in a  $0.067\text{ M}$   $\text{NaOH}$  aqueous solution [2].

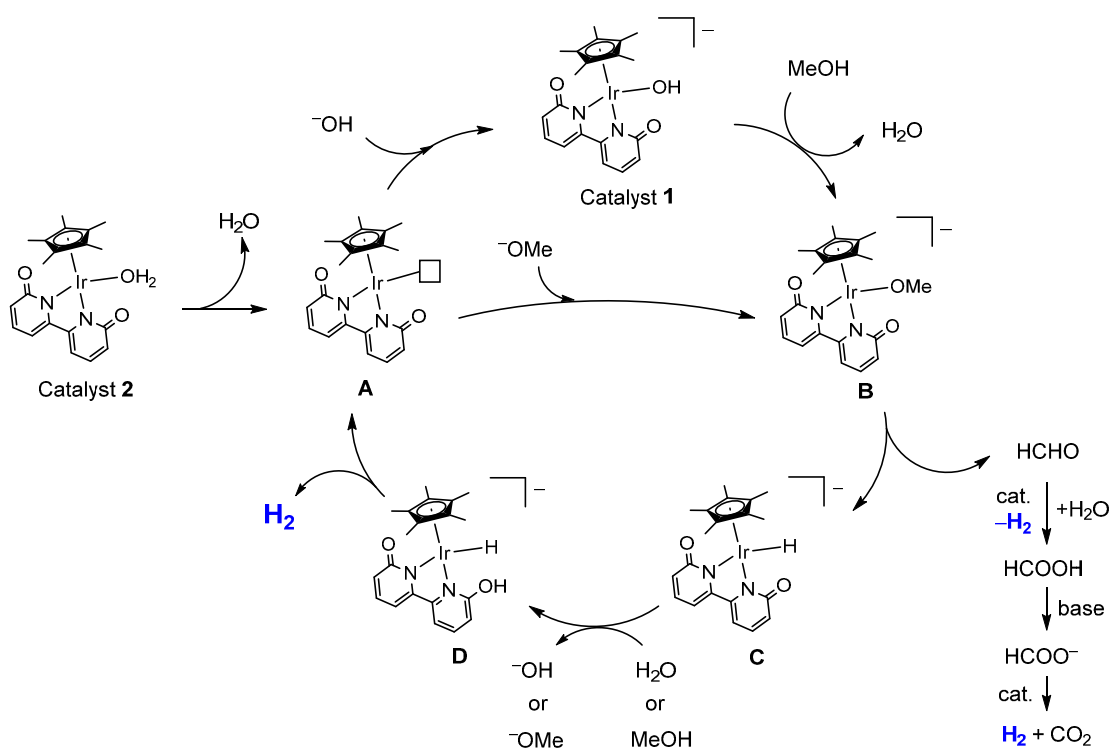

**Scheme S1.** Possible mechanism for the hydrogen production from a methanol-water solution [2]

## References

- [1] R. Kawahara, K. Fujita, and R. Yamaguchi, *Angew. Chem. Int. Ed.*, **2012**, *51*, 12790.
- [2] K. Fujita, R. Kawahara, T. Aikawa, and R. Yamaguchi, *Angew. Chem. Int. Ed.*, **2015**, *54*, 9057.
